# Supplementary material for: Impact of Synbiotic Intake on Liver Metabolism in Metabolically Healthy Participants and Its Potential Preventive Effect on Metabolic-Dysfunction-Associated Fatty Liver Disease (MAFLD): A Randomized, Placebo-Controlled, Double-Blinded Clinical Trial
Source: MDPI journal article supplement (doi:10.3390/nu16091300), 2024-04-26
Supplement: s1 [file s1]

**Table S1:** Baseline characteristics of energy and macronutrient, serotonin, and amino acid intake in the study population

|                         | Total<br>n=86            | SYN<br>n=45 (52.3%)     | PLA<br>n=41 (47.7%)     | <i>P</i> value |
|-------------------------|--------------------------|-------------------------|-------------------------|----------------|
| Energy (kcal/d)         | 2838.12 (1511.2, 5623.4) | 2740.16 (1511.2,3918.1) | 2943.25 (1538.5,5623.4) | 0.205          |
| CH (g/d)                | 304.80 (162.0,883.9)     | 289.04 (162.0,522.9)    | 321.72 (174.6,883.9)    | 0.135          |
| Protein (g/d)           | 114.62 (52.1,284.7)      | 113.35 (52.1,284.7)     | 116.00 (60.9,223.0)     | 0.342          |
| Fat (g/d)               | 119.80 (44.1,212.2)      | 115.42 (67.3,165.1)     | 124.51 (44.1,212.2)     | 0.372          |
| Serotonin (µg/L)        | 116.55 (19.5,260.8)      | 118.1 (58.6,260.8)      | 114.46 (19.5,207.0)     | 0.882          |
| Glutamic Acid (nmol/mL) | 44.02 (8.8,108.4)        | 44.42 (8.8,108.8)       | 43.58 (15.9,85.9)       | 0.861          |
| Asparagine (nmol/mL)    | 64.15 (44.3,100.8)       | 66.14 (44.3,100.8)      | 61.96 (46.3,94.1)       | 0.124          |
| Serine (nmol/mL)        | 121.47 (77.5,176.6)      | 120.56 (83.2,176.6)     | 122.48 (77.5,168.6)     | 0.720          |
| Glutamine (nmol/mL)     | 1013.97 (741.5,1357.1)   | 1005.22 (793.4,1341.9)  | 1023.57 (741.5,1357.1)  | 0.565          |
| Histidine (nmol/mL)     | 65.62 (40.1,103.8)       | 65.81 (40.1,103.8)      | 65.41 (44.7,94.8)       | 0.586          |
| Glycine (nmol/mL)       | 317.46 (193.1,541.0)     | 326.62 (197.3,541.0)    | 307.41 (193.1,486.2)    | 0.165          |
| Threonine (nmol/mL)     | 132.67 (70.2,204.6)      | 137.87 (82.2,204.6)     | 126.97 (70.2,200.0))    | 0.100          |
| Citrulline (nmol/mL)    | 34.1 (17.3,52.6)         | 35.45 (17.3,52.6)       | 34.11 (22.8,51.8)       | 0.378          |
| Arginine (nmol/mL)      | 93.7 (52.0,159.6)        | 95.41 (52.0,155.4)      | 91.90 (60.1,159.6)      | 0.390          |
| Alanine (nmol/mL)       | 351.86 (153.5,641.1)     | 353.81 (222.3,558.1)    | 349.71 (153.5,641.1)    | 0.825          |
| Taurine (nmol/mL)       | 59.07 (37.0,98.0)        | 59.60 (37.0,92.0)       | 58.49 (39.9,98.0)       | 0.551          |
| Tyrosine (nmol/mL)      | 70.46 (36.4,123.6)       | 68.45 (36.4,101.4)      | 72.67 (41.0,123.6)      | 0.156          |
| Valine (nmol/mL)        | 324.57 (189.7,517.8)     | 325.29 (189.7,468.6)    | 323.77 (230.7,517.8)    | 0.583          |

|                         |                         |                      |                      |       |
|-------------------------|-------------------------|----------------------|----------------------|-------|
| Methionine (nmol/mL)    | 41.48 (27.6,66.9)       | 41.98 (29.5,61.8)    | 40.93 (27.6,66.9)    | 0.468 |
| Tryptophan (nmol/mL)    | 65.69 (36.3,96.9)       | 66.60 (36.3,96.9)    | 64.70 (46.6,95.4)    | 0.394 |
| Phenylalanine (nmol/mL) | 71.13 (45.6,106.1)      | 70.76 (45.6,91.0)    | 71.53 (49.5,106.1)   | 0.764 |
| Isoleucine (nmol/mL)    | 91.70 (61.2,152.7)      | 91.33 (61.2)         | 92.11 (64.0,152.7)   | 0.887 |
| Ornithine (nmol/mL)     | 80.16 (37.1,140.8)      | 80.43 (37.1,140.8)   | 79.87 (45.9,128.9)   | 0.782 |
| Leucine (nmol/mL)       | 173.02<br>(103.0,273.1) | 172.11 (103.0,246.7) | 174.03 (118.0,273.1) | 0.681 |
| Lysine (nmol/mL)        | 217.16<br>(129.8,395.6) | 222.00 (129.8,304.3) | 211.85 (137.7,395.6) | 0.180 |
