# Supplementary material for: Impact of Synbiotic Intake on Liver Metabolism in Metabolically Healthy Participants and Its Potential Preventive Effect on Metabolic-Dysfunction-Associated Fatty Liver Disease (MAFLD): A Randomized, Placebo-Controlled, Double-Blinded Clinical Trial
Source: MDPI journal article supplement (doi:10.3390/nu16091300), 2024-04-26
Supplement: s1 [file s1]

**Table S2** Characteristics of the one-year follow-up study population

|                          | Total<br>n=45    | SYN<br>n=23 (51.1%) | PLA<br>n=22 (48.9%) | <i>P</i> value |
|--------------------------|------------------|---------------------|---------------------|----------------|
| Weight (kg)              | 81.10 ± 8.70     | 79.34 ± 9.25        | 82.94 ± 7.87        | 0.168          |
| BMI (kg/m <sup>2</sup> ) | 24.73 ± 2.37     | 24.82 ± 2.78        | 24.63 ± 1.90        | 0.791          |
| Fat mass (%)             | 17.62 ± 3.99     | 17.75 ± 5.02        | 17.49 ± 2.61        | 0.829          |
| Energy (kcal/d)          | 2544.19 ± 613.13 | 2394.66 ± 485.59    | 2658.55 ± 687.35    | 0.250          |
| CH (g/d)                 | 266.68 ± 79.84   | 236.01 ± 61.89      | 290.14 ± 85.62      | 0.065          |
| Protein (g/d)            | 100.61 ± 26.35   | 96.98 ± 22.45       | 103.38 ± 29.35      | 0.660          |
| Fat (g/d)                | 110.75 ± 33.68   | 110.72 ± 33.50      | 110.78 ± 34.84      | 0.917          |
| TG (mg/dL)               | 96.64 ± 47.16    | 92.65 ± 48.82       | 100.82 ± 46.12      | 0.460          |
| Total chol (mg/dL)       | 184.07 ± 38.19   | 180.43 ± 38.45      | 187.86 ± 38.44      | 0.520          |
| LDL chol (mg/dL)         | 113.09 ± 29.71   | 110.35 ± 30.12      | 115.95 ± 29.70      | 0.533          |
| HDL chol (mg/dL)         | 51.47 ± 11.04    | 51.74 ± 13.41       | 51.18 ± 8.17        | 0.867          |
| AST (U/L)                | 25.60 ± 22.40    | 21.74 ± 5.11        | 29.64 ± 31.47       | 0.452          |
| ALT (U/L)                | 22.51 ± 10.02    | 22.83 ± 9.50        | 22.18 ± 10.74       | 0.609          |
| GGT (U/L)                | 20.27 ± 11.19    | 21.09 ± 12.77       | 19.41 ± 9.49        | 0.741          |
| PAL (U/L)                | 69.38 ± 19.27    | 68.91 ± 22.60       | 69.86 ± 15.58       | 0.407          |
| Glucose (mg/dL)          | 89.77 ± 7.17     | 89.61 ± 5.87        | 89.95 ± 8.51        | 0.876          |
| Insulin (mU/L)           | 8.73 ± 4.40      | 8.64 ± 4.67         | 8.82 ± 4.21         | 0.742          |
| HOMA-IR                  | 1.99 ± 1.10      | 1.93 ± 1.08         | 2.05 ± 1.14         | 0.690          |
| hs-CRP (mg/L)            | 4.40 ± 11.77     | 9.87 ± 19.78        | 1.37 ± 0.65         | 0.894          |
| IL-6 (pg/mL)             | 2.70 ± 2.08      | 3.04 ± 2.85         | 2.41 ± 1.07         | 0.927          |
