# Supplementary material for: Impact of Synbiotic Intake on Liver Metabolism in Metabolically Healthy Participants and Its Potential Preventive Effect on Metabolic-Dysfunction-Associated Fatty Liver Disease (MAFLD): A Randomized, Placebo-Controlled, Double-Blinded Clinical Trial
Source: MDPI journal article supplement (doi:10.3390/nu16091300), 2024-04-26
Supplement: s1 [file s1]

**Table S3:** Change in gut microbiome composition in each stratified group.

|                                             | Physiological Bodyfat Percentage<br>(n=32) |              |                | Elevated Bodyfat Percentage<br>(n=30) |               |                |
|---------------------------------------------|--------------------------------------------|--------------|----------------|---------------------------------------|---------------|----------------|
| <i>Coefficients</i>                         | <i>Estimates</i>                           | <i>CI</i>    | <i>P Value</i> | <i>Estimates</i>                      | <i>CI</i>     | <i>P Value</i> |
| (Intercept)                                 | -0.13                                      | -0.68 – 0.41 | 0.62           | 0.12                                  | -0.42 – 0.66  | 0.655          |
| Age                                         | 0.03                                       | -0.37 – 0.43 | 0.88           | 0.28                                  | -0.09 – 0.65  | 0.134          |
| Fat Mass                                    | -0.07                                      | -0.33 – 0.48 | 0.71           | -0.11                                 | -0.47 – 0.24  | 0.520          |
| Group [SYN]                                 | 0.26                                       | -0.55 – 1.06 | 0.51           | -0.10                                 | -0.82 – 0.63  | 0.785          |
| Baseline Microbial Diversity                | -0.22                                      | -0.75 – 0.30 | 0.39           | -1.27                                 | -2.29 – -0.26 | <b>0.016</b>   |
| Baseline Microbial Diversity*Group<br>[SYN] | 0.15                                       | -0.68 – 0.97 | 0.72           | 1.16                                  | 0.06 – 2.25   | <b>0.039</b>   |
| Marginal R2 / Conditional R2                | 0.046 / -0.137                             |              |                | 0.328 / 0.188                         |               |                |
