# Supplementary material for: Impact of Synbiotic Intake on Liver Metabolism in Metabolically Healthy Participants and Its Potential Preventive Effect on Metabolic-Dysfunction-Associated Fatty Liver Disease (MAFLD): A Randomized, Placebo-Controlled, Double-Blinded Clinical Trial
Source: Nutrients. 2024 Apr 26;16(9):1300. doi: 10.3390/nu16091300 (PMC11085762; doi:10.3390/nu16091300)
Supplement: Supplementary file 1 [file nutrients-16-01300-s001.zip]

Archive with 5 entries (5 files):
- nutrients-2934984-supplementary/Figure S1.pdf
- nutrients-2934984-supplementary/Health Research Reporting Checklist.pdf
- nutrients-2934984-supplementary/Table S1.pdf
- nutrients-2934984-supplementary/Table S2.pdf
- nutrients-2934984-supplementary/Table S3.pdf
