# Supplementary figures and images for: Impact of Synbiotic Intake on Liver Metabolism in Metabolically Healthy Participants and Its Potential Preventive Effect on Metabolic-Dysfunction-Associated Fatty Liver Disease (MAFLD): A Randomized, Placebo-Controlled, Double-Blinded Clinical Trial
Source: MDPI journal article supplement (doi:10.3390/nu16091300), 2024-04-26

**Supplementary Figure S1:** Flow chart of the study population from randomization to analysis

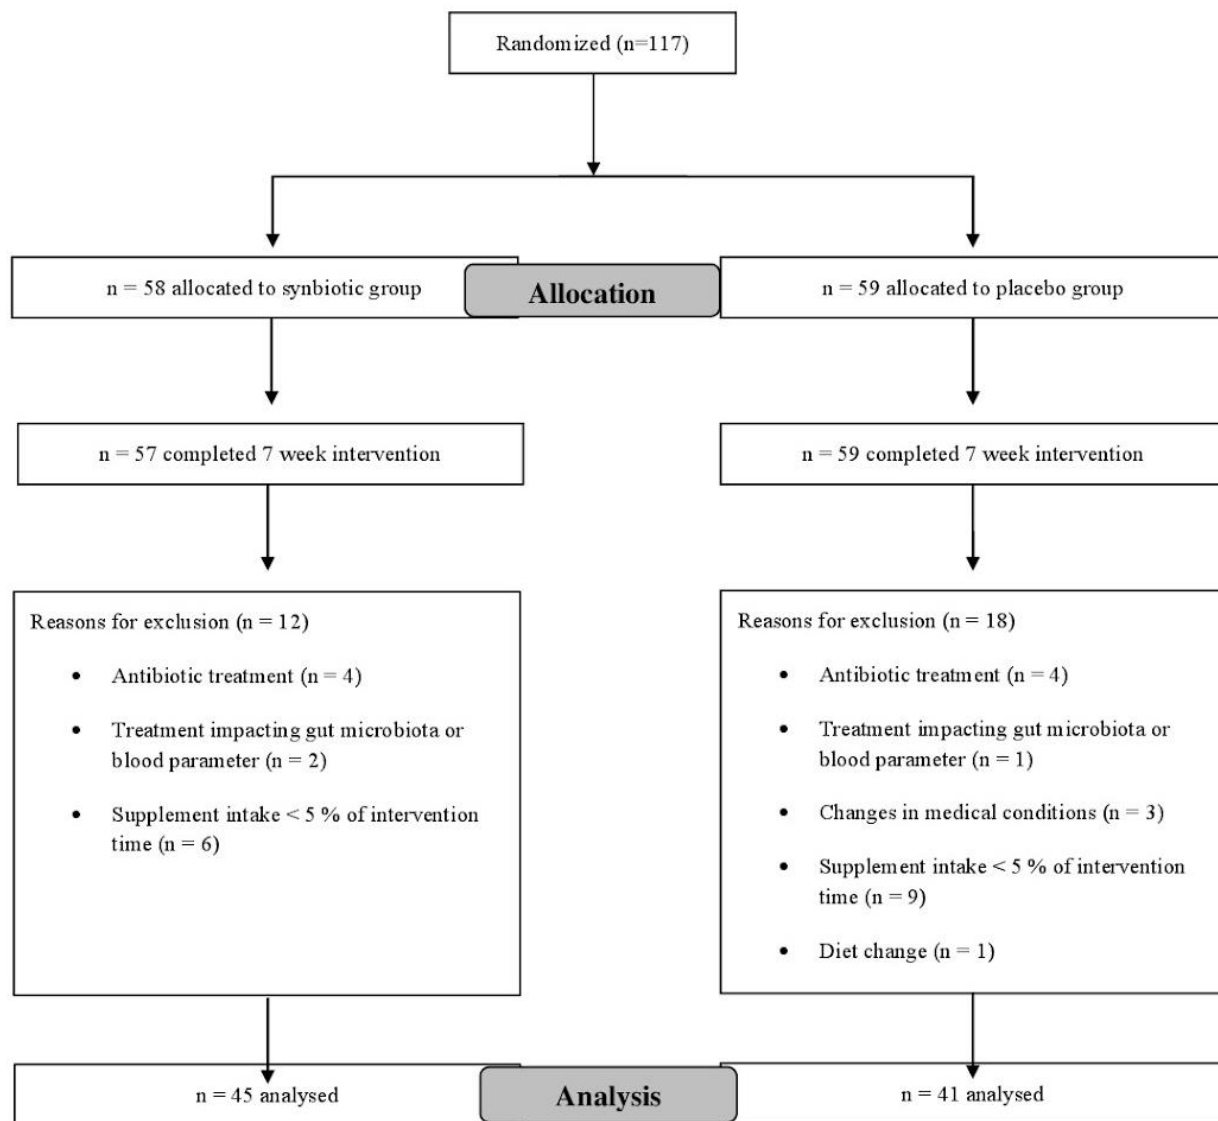

Supplement: s1 [file s1]
